# Supplementary material for: Guidelines on constructing funnel plots for quality indicators: A case study on mortality in intensive care unit patients
Source: PubMed Central journal article supplement — Stat Methods Med Res. 2017 Mar 23;27(11):3350–66. doi: 10.1177/0962280217700169 (PMC6193208; doi:10.1177/0962280217700169), 2017-03-23

Figure S1. Number of admissions required to get 80% power to detect an increase of 1.5 times the benchmark value for different benchmark probabilities.

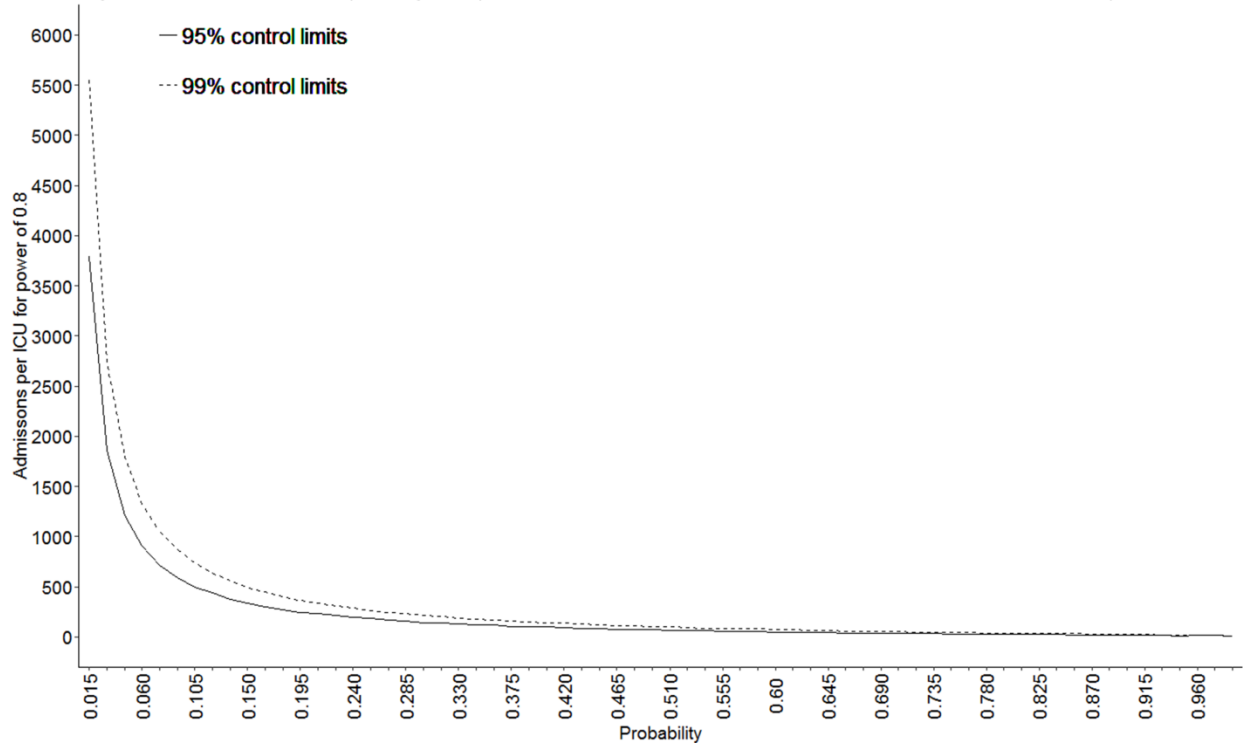

Figure S2. Calibration plots based on ICUs for all, medical admissions and admissions following elective or emergency surgery.

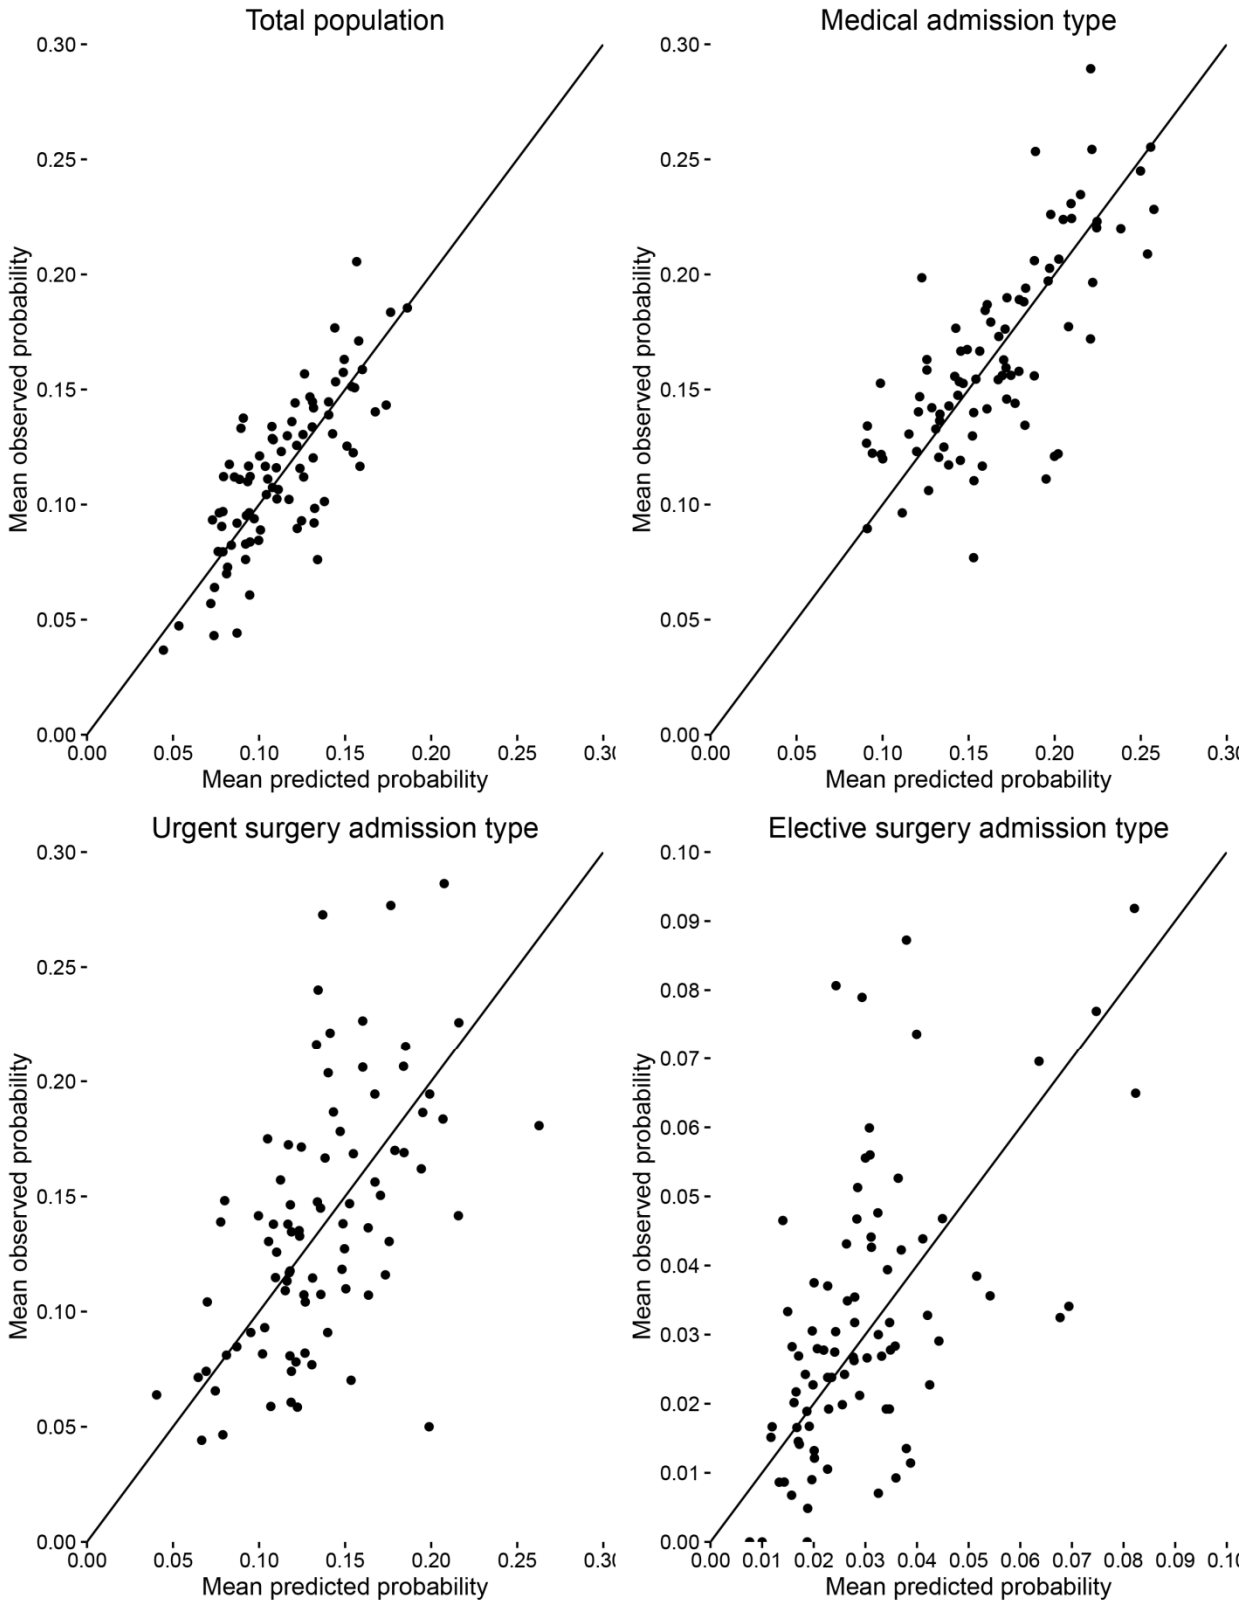

Figure S3. Relationship between SMR and the average probability of mortality per ICU for the subgroup of medical admissions.

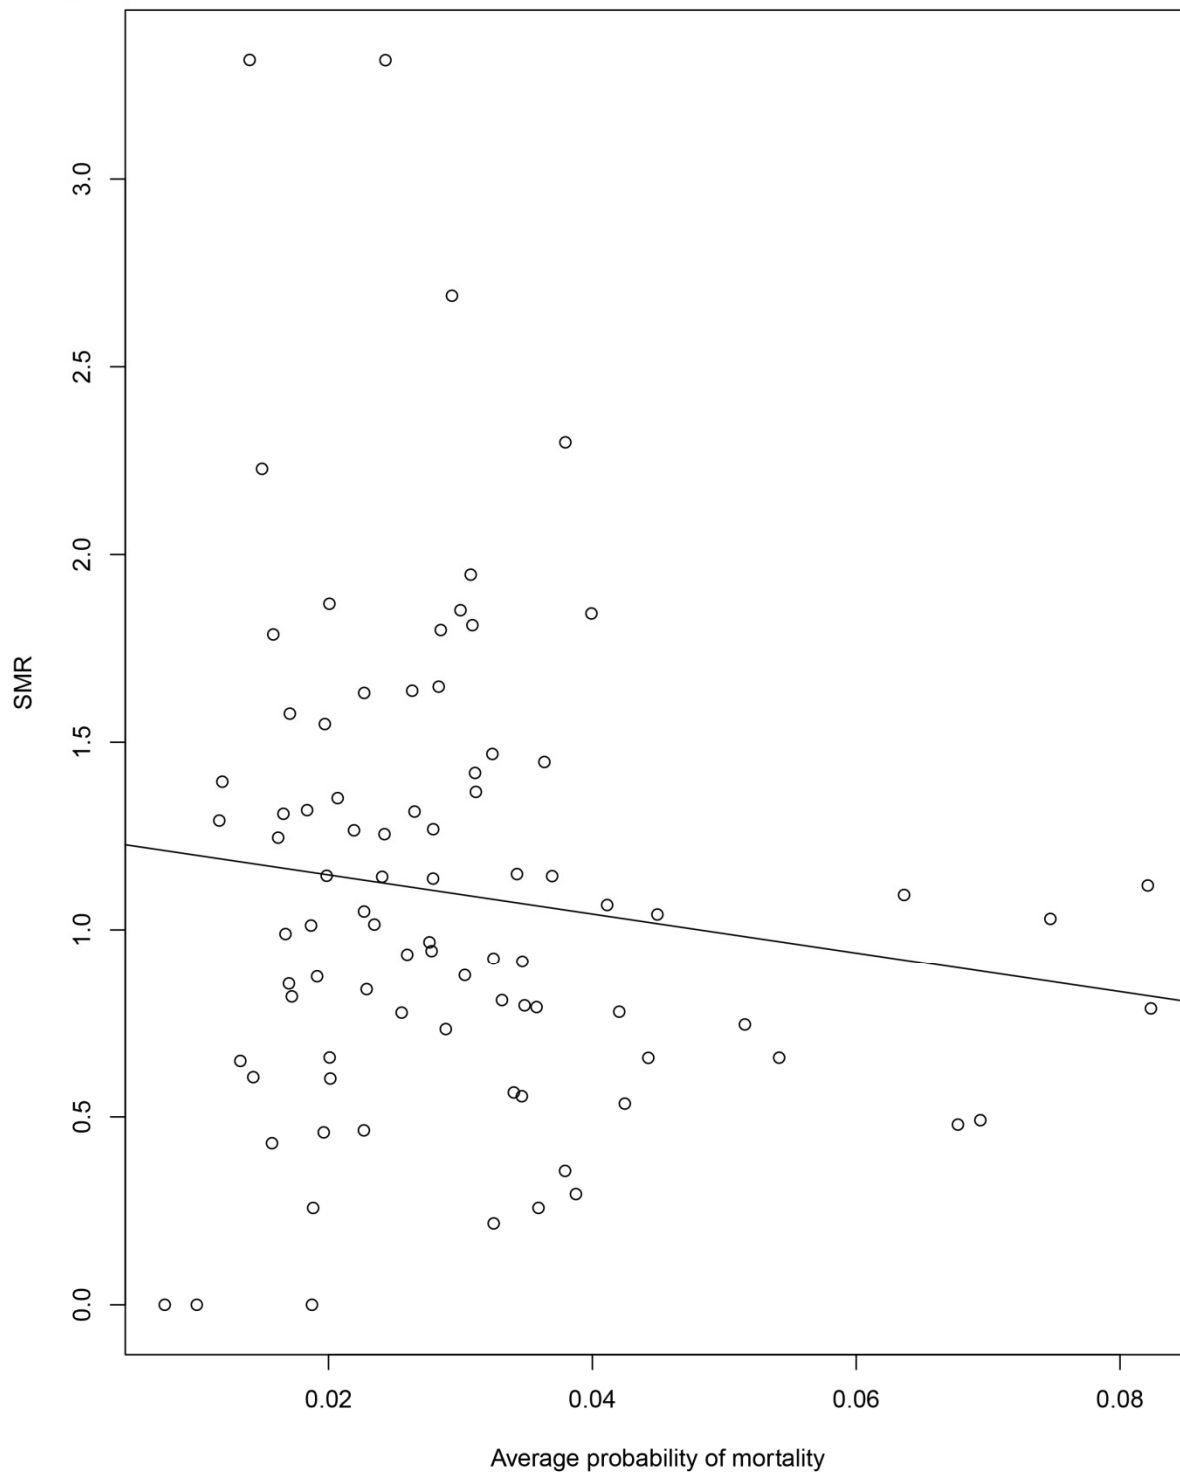

Supplement: supplementary_figures.pdf [file supplementary_figures.pdf]
