# Supplementary material for: Guidelines on constructing funnel plots for quality indicators: A case study on mortality in intensive care unit patients
Source: PubMed Central journal article supplement — Stat Methods Med Res. 2017 Mar 23;27(11):3350–66. doi: 10.1177/0962280217700169 (PMC6193208; doi:10.1177/0962280217700169), 2017-03-23
Supplement: supplementary_TableS1.pdf [file supplementary_TableS1.pdf]

Table S1. Coefficient of recalibration of the APACHE IV model for the probability of mortality of ICU patients.

|                                                                | Coefficients for patients not undergoing Coronary Artery Bypass Grafting (CABG) | Coefficients for Coronary Artery Bypass Grafting (CABG) patients |
|----------------------------------------------------------------|---------------------------------------------------------------------------------|------------------------------------------------------------------|
| Intercept                                                      | -4.007                                                                          | -1.126                                                           |
| logit probability of mortality                                 | 0.941                                                                           | 0.912                                                            |
| <i>Admission type (reference elective surgery)</i>             |                                                                                 |                                                                  |
| Medical                                                        | 2.733                                                                           |                                                                  |
| Urgent                                                         | 3.051                                                                           |                                                                  |
| <i>Spline APACHE III score</i>                                 |                                                                                 |                                                                  |
| APACHE III score                                               | 0.087                                                                           |                                                                  |
| [APACHE III score - 20 ] <sup>3</sup>                          | -6.36E-05                                                                       |                                                                  |
| [APACHE III score - 38 ] <sup>3</sup>                          | 1.90E-04                                                                        |                                                                  |
| [APACHE III score - 52 ] <sup>3</sup>                          | -1.73E-04                                                                       |                                                                  |
| [APACHE III score - 69 ] <sup>3</sup>                          | 5.00E-05                                                                        |                                                                  |
| [APACHE III score - 116 ] <sup>3</sup>                         | -3.49E-06                                                                       |                                                                  |
| <i>Medical admission type x spline APACHE III score</i>        |                                                                                 |                                                                  |
| APACHE III score                                               | -0.076                                                                          |                                                                  |
| [APACHE III - 20 ] <sup>3</sup>                                | 6.63E-05                                                                        |                                                                  |
| [APACHE III - 38 ] <sup>3</sup>                                | -2.05E-04                                                                       |                                                                  |
| [APACHE III - 52 ] <sup>3</sup>                                | 1.89E-04                                                                        |                                                                  |
| [APACHE III - 69 ] <sup>3</sup>                                | -5.25E-05                                                                       |                                                                  |
| [APACHE III - 116 ] <sup>3</sup>                               | 2.28E-06                                                                        |                                                                  |
| <i>Urgent surgery admission type x spline APACHE III score</i> |                                                                                 |                                                                  |
| APACHE III                                                     | -0.079                                                                          |                                                                  |
| [APACHE III - 20 ] <sup>3</sup>                                | 4.81E-05                                                                        |                                                                  |
| [APACHE III - 38 ] <sup>3</sup>                                | -1.24E-04                                                                       |                                                                  |
| [APACHE III - 52 ] <sup>3</sup>                                | 8.90E-05                                                                        |                                                                  |
| [APACHE III - 69 ] <sup>3</sup>                                | -1.44E-05                                                                       |                                                                  |
| [APACHE III - 116 ] <sup>3</sup>                               | 8.58E-07                                                                        |                                                                  |
